# Supplementary material
Source: publisher figshare collection journal article supplement (https://tandf.figshare.com/ndownloader/files/18509993)
Supplement: Supplementary file 1 [file 18509993]

**Supplemental Material S1**

**
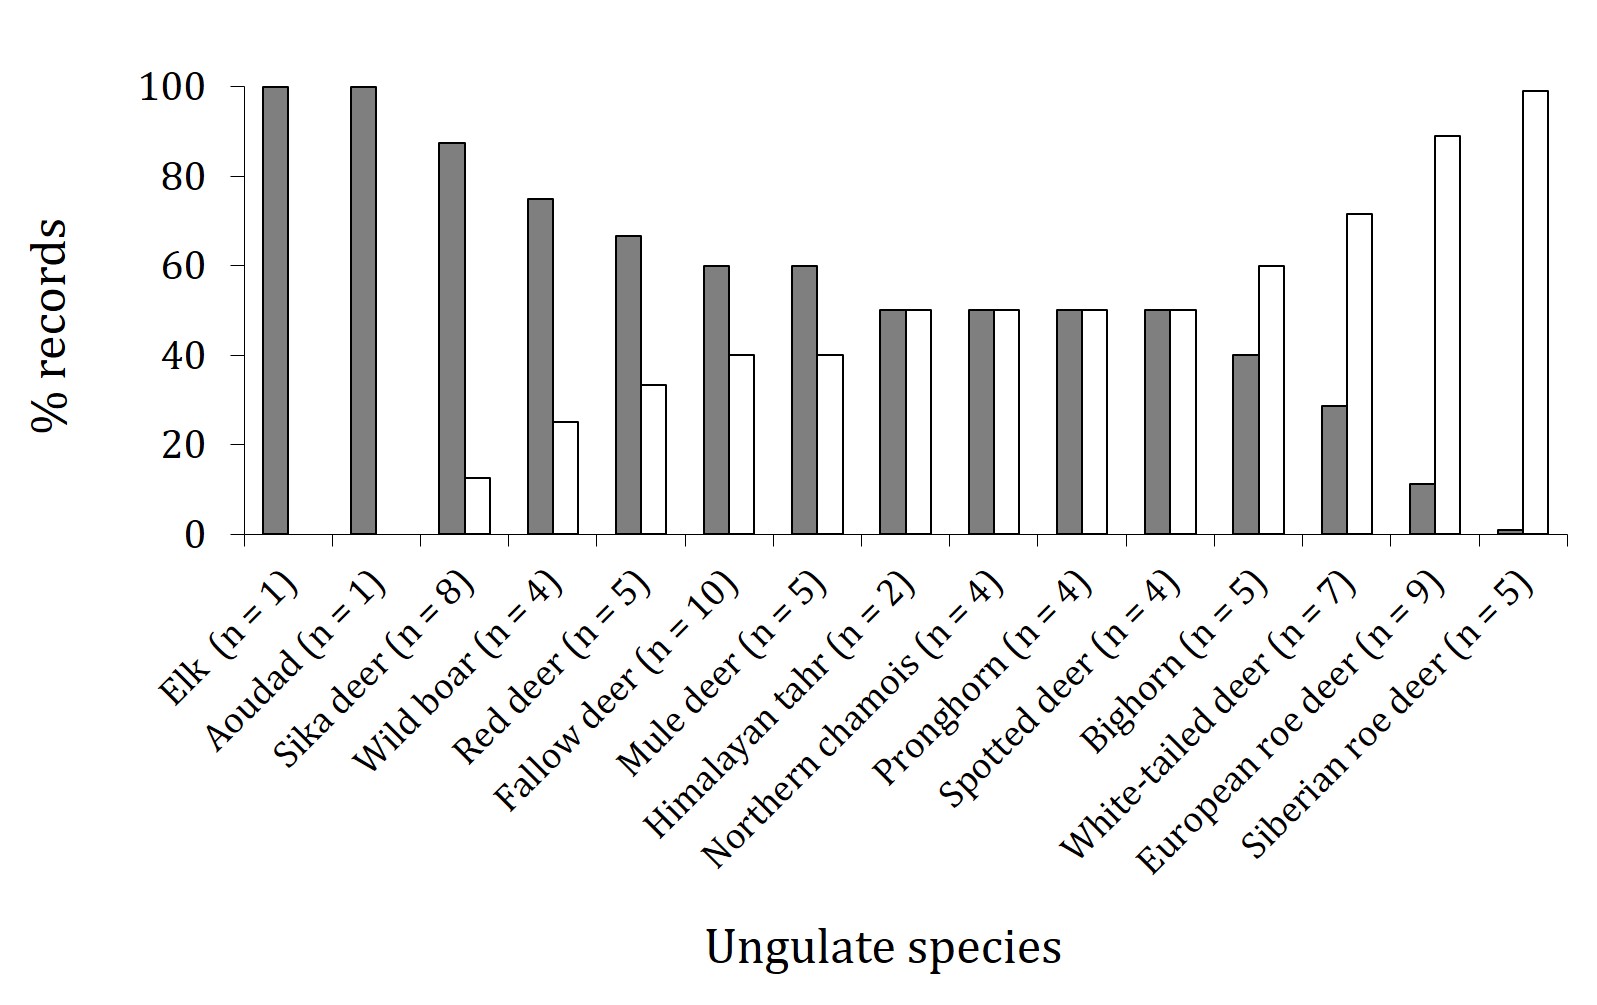
**

**Figure S1.** Histograms show the ungulate species in interference interactions as displacing (grey bars) or displaced (white bars). Number of studies per species is reported in brackets.
